# Supplementary material
Source: MDPI journal article supplement (https://www.mdpi.com/2311-5629/10/1/26)
Supplement: s1 [file s1]

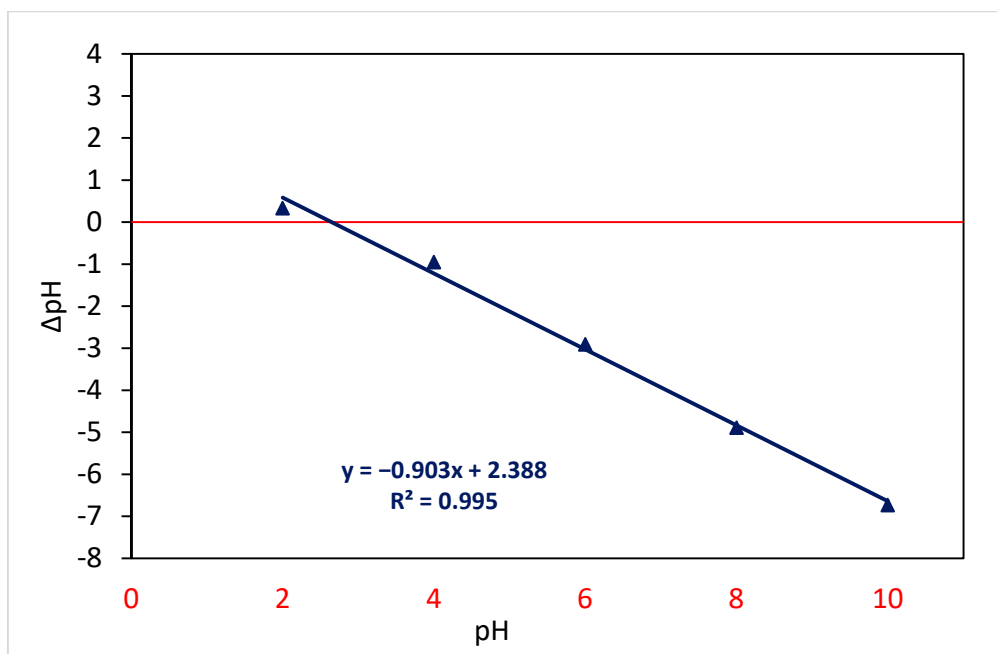

**Figure S1:** Experimental determination of pHpzc.

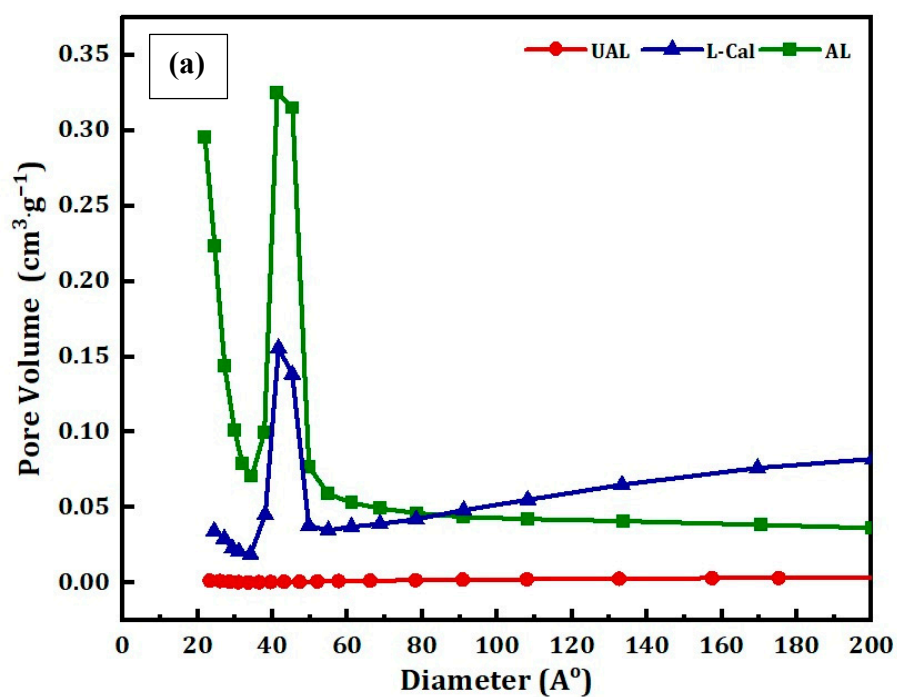

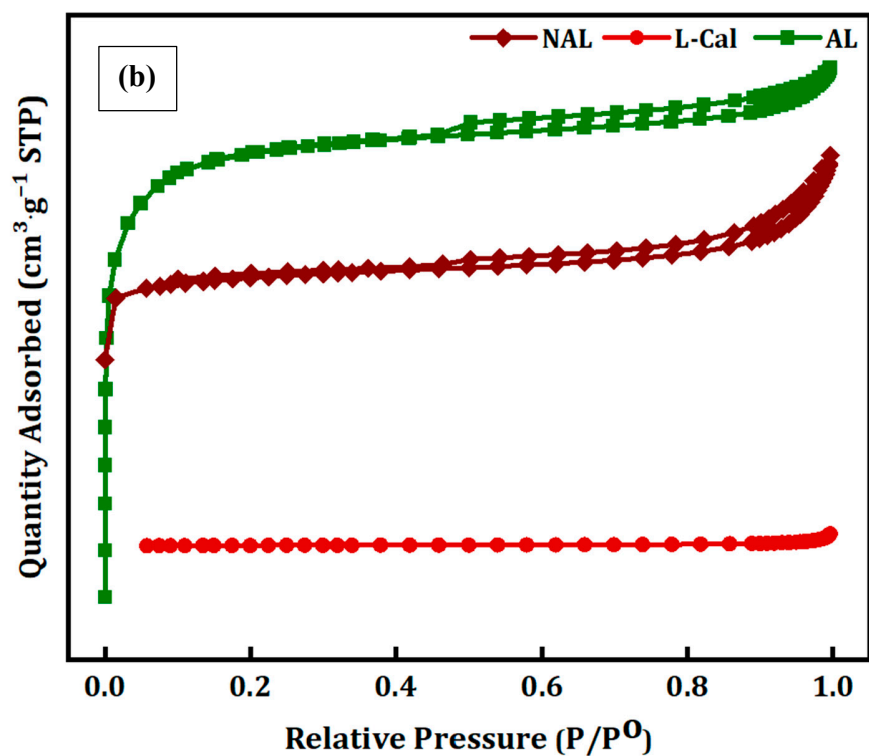

**Figure S2:** (a) Pore size distribution of the synthesized samples and (b) Nitrogen physisorption isotherms.

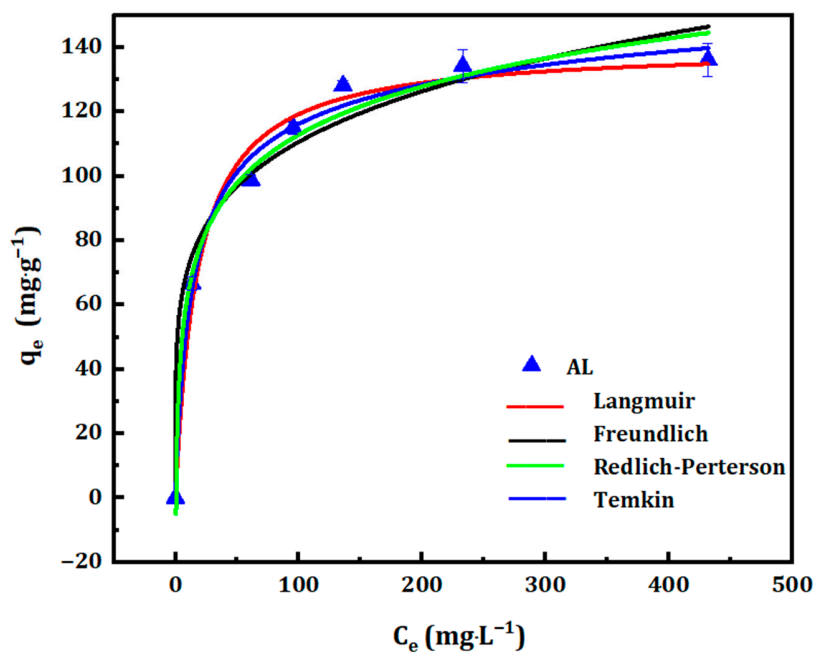

**Figure S3:** Nonlinear fitting of adsorption isotherm models.

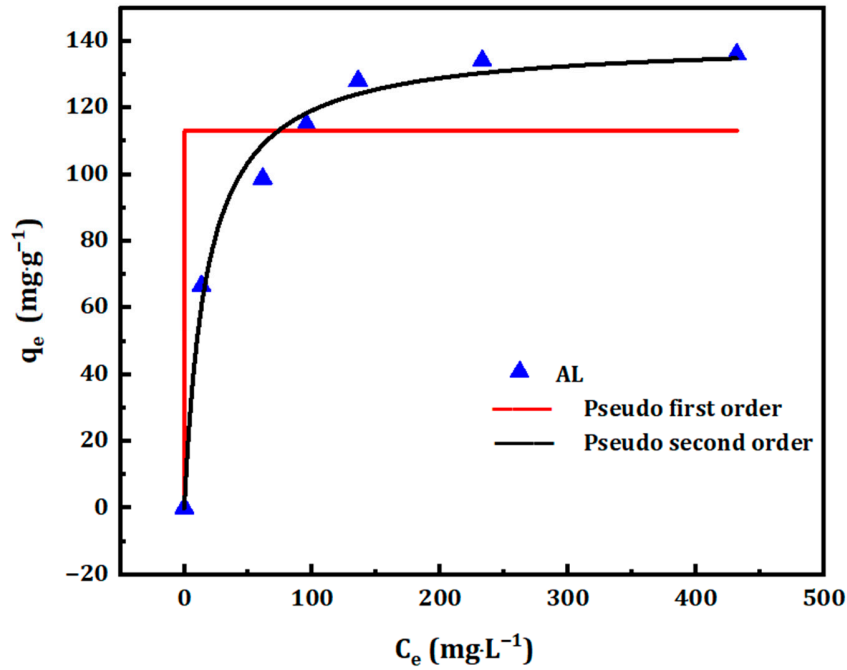

**Figure S4:** Nonlinear fitting of adsorption kinetic models.

**Table S1:** Langmuir, Freundlich, Redlich-Peterson and Temkin Isotherm Constants for the AL

| CM Samples | Langmuir Constants                  |                                |       | Freundlich Constants |                                                                    |       |
|------------|-------------------------------------|--------------------------------|-------|----------------------|--------------------------------------------------------------------|-------|
|            | $Q_{\max}$<br>(mg·g <sup>-1</sup> ) | $K_L$<br>(L·mg <sup>-1</sup> ) | $R^2$ | $1/n$                | $K_F$<br>(mg <sup>1-1/n</sup> ·L <sup>1/n</sup> ·g <sup>-1</sup> ) | $R^2$ |
| AL         | 140.36                              | 0.056                          | 0.987 | 0.19                 | 45.82                                                              | 0.976 |
|            | Redlich-Peterson Constants          |                                |       | Temkin Constants     |                                                                    |       |
|            | $B$                                 | $A$                            | $R^2$ | $B$                  | $A$                                                                | $R^2$ |
| AL         | 0.93                                | 0.12                           | 0.992 | 21.613               | 1.852                                                              | 0.987 |

**Table S2:** Pseudo-first-order and Pseudo-second-order Constants for the AL

| Kinetics Model      | $q_{\text{theo.}}$ | K      | $R^2$ |
|---------------------|--------------------|--------|-------|
| Pseudo-first-order  | 113.1              | 21.7   | 0.755 |
| Pseudo-second-order | 140.36             | 0.0004 | 0.987 |

**Table S3:** Comparison of Various Adsorbent-Based Hydrochars Prepared by the HTC Process for their Lead (II) Removal

| Adsorbent                    | pH  | Adsorbent dosage (g·L <sup>-1</sup> ) | Concentrations used (mg·L <sup>-1</sup> )   | Equilibrium time (hr) | $q_{\max}$ (mg g <sup>-1</sup> ) | Advantages                                                                                                                                                                                                                                                 | Limitations                                                                                                                                                                      | Reference |
|------------------------------|-----|---------------------------------------|---------------------------------------------|-----------------------|----------------------------------|------------------------------------------------------------------------------------------------------------------------------------------------------------------------------------------------------------------------------------------------------------|----------------------------------------------------------------------------------------------------------------------------------------------------------------------------------|-----------|
| Canola straw                 | 6.3 | 0.4                                   | 0, 50, 75, 100, 150, 200                    | 3                     | 24.4                             | <ul style="list-style-type: none"> <li>▪ Abundantly available</li> <li>▪ &gt; 80% of lead(II) adsorption occurred in the first 3 h</li> <li>▪ Production temperature is low (180 °C)</li> <li>▪ The yield is relatively high (60.5%)</li> </ul>            | <ul style="list-style-type: none"> <li>▪ Low surface area (4.4 m<sup>2</sup> g<sup>-1</sup>)</li> <li>▪ Low adsorption capacity</li> </ul>                                       | [22]      |
| Wheat straw                  | 5.4 | 0.4                                   | 0, 50, 75, 100, 150, 200                    | 3                     | 9.94                             | <ul style="list-style-type: none"> <li>▪ Abundantly available</li> <li>▪ &gt; 80% of lead(II) adsorption occurred in the first 3 h</li> <li>▪ Production temperature is low (180 °C)</li> <li>▪ High yield (69.5%)</li> </ul>                              | <ul style="list-style-type: none"> <li>▪ Low surface area (4.5 m<sup>2</sup> g<sup>-1</sup>)</li> <li>▪ Not suitable for lead removal due to low adsorption capacity</li> </ul>  | [22]      |
| Sawdust of white spruce      | 3.3 | 0.4                                   | 0, 50, 75, 100, 150, 200                    | 3                     | 7.69                             | <ul style="list-style-type: none"> <li>▪ Abundantly available</li> <li>▪ &gt; 80% of lead(II) adsorption occurred in the first 3 h</li> <li>▪ Production temperature is relatively low (240 °C)</li> <li>▪ The yield is relatively high (54.5%)</li> </ul> | <ul style="list-style-type: none"> <li>▪ Low surface area (30.6 m<sup>2</sup> g<sup>-1</sup>)</li> <li>▪ Not suitable for lead removal due to low adsorption capacity</li> </ul> | [22]      |
| Manure pellet                | 5.5 | 0.4                                   | 0, 50, 75, 100, 150, 200                    | 3                     | 23.8                             | <ul style="list-style-type: none"> <li>▪ Abundantly available</li> <li>▪ &gt; 80% of lead(II) adsorption occurred in the first 3 h</li> <li>▪ Production temperature is low (180 °C)</li> <li>▪ High yield (67.5%)</li> </ul>                              | <ul style="list-style-type: none"> <li>▪ Low surface area (11.7 m<sup>2</sup> g<sup>-1</sup>)</li> <li>▪ Low adsorption capacity</li> </ul>                                      | [22]      |
| <i>Crocus sativus</i> petals | 5   | 0.5                                   | 50,75,100, 125, 150, 175, 200               | 11.5                  | 89.5                             | <ul style="list-style-type: none"> <li>▪ Abundantly available</li> <li>▪ High surface area (862.4 m<sup>2</sup> g<sup>-1</sup>)</li> <li>▪ Good adsorption capacity</li> </ul>                                                                             | <ul style="list-style-type: none"> <li>▪ Low yield (21%)</li> <li>▪ High activation temperature (800 °C)</li> </ul>                                                              | [23]      |
| Paulownia leaves             | 5   | 1                                     | 0, 30, 50, 70, 100, 150, 200, 300, 400, 500 | 25                    | 174.8                            | <ul style="list-style-type: none"> <li>▪ Abundantly available</li> <li>▪ Production temperature is relatively low (220 °C)</li> <li>▪ Good adsorption capacity</li> </ul>                                                                                  |                                                                                                                                                                                  | [16]      |
| Grape pomace                 | 5   | 0.5                                   | 40–180                                      | 3                     | 137                              | <ul style="list-style-type: none"> <li>▪ Abundantly available</li> <li>▪ Production temperature is relatively low (220 °C)</li> </ul>                                                                                                                      |                                                                                                                                                                                  | [24]      |

|                           |     |      |                                 |    |       |                                                                                                                                                                                                                 |                                                                                                                                          |      |
|---------------------------|-----|------|---------------------------------|----|-------|-----------------------------------------------------------------------------------------------------------------------------------------------------------------------------------------------------------------|------------------------------------------------------------------------------------------------------------------------------------------|------|
|                           |     |      |                                 |    |       | <ul style="list-style-type: none"> <li>▪ Good adsorption capacity</li> </ul>                                                                                                                                    |                                                                                                                                          |      |
| <i>Laminaria japonica</i> |     | 1    | 10–200                          | 6  | 108   | <ul style="list-style-type: none"> <li>▪ Production temperature is relatively low (200 °C)</li> <li>▪ Short residence time (45 min)</li> <li>▪ Good adsorption capacity</li> </ul>                              | <ul style="list-style-type: none"> <li>▪ Low yield (&lt; 27%)</li> <li>▪ Low surface area (2.23 m<sup>2</sup> g<sup>-1</sup>)</li> </ul> | [58] |
| Sawdust                   | 5   |      | 10–200                          | 1  | 92.8  | <ul style="list-style-type: none"> <li>▪ Abundantly available</li> <li>▪ Production temperature is relatively low (260 °C)</li> <li>▪ Good adsorption capacity</li> </ul>                                       |                                                                                                                                          | [59] |
| Lincomycin residue        | 5-6 | 1.33 | 10, 50, 100, 150, 200           | 4  | 57.4  | <ul style="list-style-type: none"> <li>▪ Production temperature is relatively low (210 °C)</li> <li>▪ Short residence time (60 min)</li> <li>▪ Acceptable adsorption capacity</li> </ul>                        | <ul style="list-style-type: none"> <li>▪ Medium yield (45%)</li> </ul>                                                                   | [60] |
| Soybean                   | 4   | 1.33 | 10–200                          | 3  | 104   | <ul style="list-style-type: none"> <li>▪ Abundantly available</li> <li>▪ Production temperature is relatively low (210 °C)</li> <li>▪ High yield (90%)</li> <li>▪ Good adsorption capacity</li> </ul>           |                                                                                                                                          | [61] |
| Chitosan                  | 4   | 1.33 | 10–200                          | 3  | 86.2  | <ul style="list-style-type: none"> <li>▪ Abundantly available</li> <li>▪ Production temperature is relatively low (210 °C)</li> <li>▪ Good adsorption capacity</li> </ul>                                       | <ul style="list-style-type: none"> <li>▪ Medium yield (41%)</li> </ul>                                                                   | [61] |
| Oil-tea camellia shells   | 3–6 | 0.4  | 10–480                          | 5  | 476   | <ul style="list-style-type: none"> <li>▪ Abundantly available</li> <li>▪ High adsorption capacity</li> </ul>                                                                                                    | <ul style="list-style-type: none"> <li>▪ Two steps of the heating process (600 °C for 1 h and 120 °C for 6 h)</li> </ul>                 | [62] |
| <i>Camellia sinensis</i>  | 5   | 1    | 100                             | 6  | 143.9 | <ul style="list-style-type: none"> <li>▪ Abundantly available</li> <li>▪ Production temperature is relatively low (240 °C)</li> <li>▪ Good adsorption capacity</li> </ul>                                       | <ul style="list-style-type: none"> <li>▪ Medium yield (51%)</li> </ul>                                                                   | [63] |
| <i>Camellia sinensis</i>  | 5   | 1    | 0, 150, 300, 450, 600, 750, 900 | 24 | 198.7 | <ul style="list-style-type: none"> <li>▪ Abundantly available</li> <li>▪ Production temperature is relatively low (240 °C)</li> <li>▪ Short residence time (2 h)</li> <li>▪ High adsorption capacity</li> </ul> | <ul style="list-style-type: none"> <li>▪ Low yield (35%)</li> <li>▪ Low surface area (18.7 m<sup>2</sup> g<sup>-1</sup>)</li> </ul>      | [64] |

|                               |     |     |                                                                   |      |       |                                                                                                                                                                                                                    |                                                                                                                                                                           |      |
|-------------------------------|-----|-----|-------------------------------------------------------------------|------|-------|--------------------------------------------------------------------------------------------------------------------------------------------------------------------------------------------------------------------|---------------------------------------------------------------------------------------------------------------------------------------------------------------------------|------|
| Fresh banana peels            | 6   | 4   | 5–1000                                                            | 5.5  | 241   | <ul style="list-style-type: none"> <li>▪ Abundantly available</li> <li>▪ Production temperature is relatively low (230 °C)</li> <li>▪ Short residence time (2 h)</li> <li>▪ High adsorption capacity</li> </ul>    | <ul style="list-style-type: none"> <li>▪ Low yield (29%)</li> <li>▪ Low surface area (31.5 m<sup>2</sup> g<sup>-1</sup>)</li> </ul>                                       | [25] |
| Fresh banana peels            | 6   | 1   | 30, 60, 90, 120, 150, 180, 200, 250, 300, 350, 400, 500, 600, 700 | 12   | 238   | <ul style="list-style-type: none"> <li>▪ Abundantly available</li> <li>▪ Production temperature is relatively low (200 °C)</li> <li>▪ Short residence time (2 h)</li> <li>▪ High adsorption capacity</li> </ul>    | <ul style="list-style-type: none"> <li>▪ Low yield (26%)</li> <li>▪ Low surface area (47.2 m<sup>2</sup> g<sup>-1</sup>)</li> </ul>                                       | [26] |
| Sludge                        | 5–6 | 0.6 | 75, 100, 150                                                      | 12.5 | 174   | <ul style="list-style-type: none"> <li>▪ Abundantly available</li> <li>▪ Production temperature is relatively low (180 °C)</li> <li>▪ Short residence time (2 h)</li> <li>▪ Good adsorption capacity</li> </ul>    | <ul style="list-style-type: none"> <li>▪ Low yield (26%)</li> <li>▪ Long residence time (10 h)</li> <li>▪ Low surface area (47.2 m<sup>2</sup> g<sup>-1</sup>)</li> </ul> | [65] |
| Sewage sludge                 | 4.3 | 0.5 | 0–100                                                             | 12.5 | 62.4  | <ul style="list-style-type: none"> <li>▪ Abundantly available</li> <li>▪ Production temperature is low (120 °C)</li> <li>▪ Acceptable adsorption capacity</li> </ul>                                               |                                                                                                                                                                           | [66] |
| <i>Eupatorium adenophorum</i> | 6   | 2   | 50, 100, 200, 300, 400, 500, 600, 800                             | 2.5  | 165   | <ul style="list-style-type: none"> <li>▪ Abundantly available</li> <li>▪ Production temperature is relatively low (220 °C)</li> <li>▪ Short residence time (1 h)</li> <li>▪ Good adsorption capacity</li> </ul>    |                                                                                                                                                                           | [67] |
| Natural honey                 | 5   | 0.2 | 100–700                                                           | 15   | 133.2 | <ul style="list-style-type: none"> <li>▪ Abundantly available</li> <li>▪ Production temperature is relatively low (180 °C)</li> <li>▪ Good adsorption capacity</li> </ul>                                          | <ul style="list-style-type: none"> <li>▪ Two long steps of the heating process (180 °C for 24 h and 300 °C for 20 h)</li> </ul>                                           | [68] |
| Enteromorpha                  | 8.1 | 30  | 0.2, 0.5, 0.8, 1, 2, 3, 5, 8                                      | 0.18 | 0.098 | <ul style="list-style-type: none"> <li>▪ Abundantly available</li> <li>▪ Production temperature is relatively low (250 °C)</li> <li>▪ Short residence time (40 min)</li> <li>▪ Good adsorption capacity</li> </ul> | <ul style="list-style-type: none"> <li>▪ Low surface area (29.7 m<sup>2</sup> g<sup>-1</sup>)</li> </ul>                                                                  | [69] |
| Areca nut husks               | 6   | 0.1 | 0, 25, 50, 100                                                    |      | 79.9  | <ul style="list-style-type: none"> <li>▪ Abundantly available</li> <li>▪ Production temperature is relatively low (250 °C)</li> </ul>                                                                              | <ul style="list-style-type: none"> <li>▪ Long residence time (9 h)</li> </ul>                                                                                             | [70] |

|                                   |     |     |                          |     |      |                                                                                                                                                                                                                                           |                                                                                                                                                                                                                  |           |
|-----------------------------------|-----|-----|--------------------------|-----|------|-------------------------------------------------------------------------------------------------------------------------------------------------------------------------------------------------------------------------------------------|------------------------------------------------------------------------------------------------------------------------------------------------------------------------------------------------------------------|-----------|
|                                   |     |     |                          |     |      | <ul style="list-style-type: none"> <li>▪ Short residence time (40 min)</li> <li>▪ Good yield (59%)</li> <li>▪ Good adsorption capacity</li> </ul>                                                                                         | <ul style="list-style-type: none"> <li>▪ Very low surface area (0.98 m<sup>2</sup> g<sup>-1</sup>)</li> </ul>                                                                                                    |           |
| Longan fruit exocarp              | 5.5 | 5   | 25, 50, 70, 90, 100, 150 | 6   | 22.7 | <ul style="list-style-type: none"> <li>▪ Abundantly available</li> <li>▪ Production temperature is relatively low (300 °C)</li> </ul>                                                                                                     | <ul style="list-style-type: none"> <li>▪ Long residence time (24 h)</li> <li>▪ Low yield (35.89%)</li> <li>▪ Low surface area (10.76 m<sup>2</sup> g<sup>-1</sup>)</li> <li>▪ Low adsorption capacity</li> </ul> | [71]      |
| Date palm leaves                  | 5   | 1   | 500–800                  | 0.5 | 74.5 | <ul style="list-style-type: none"> <li>▪ Abundantly available</li> <li>▪ Production temperature is relatively low (300 °C)</li> <li>▪ High yield (73%)</li> <li>▪ Good adsorption capacity</li> </ul>                                     | <ul style="list-style-type: none"> <li>▪ Long residence time (7 h)</li> </ul>                                                                                                                                    | [72]      |
| Palm date-activated leaflets (AL) | 6   | 0.5 | 50-500                   | 1   | 136  | <ul style="list-style-type: none"> <li>▪ Abundantly available</li> <li>▪ High surface area (808 m<sup>2</sup> g<sup>-1</sup>)</li> <li>▪ Production temperature is relatively low (230 °C)</li> <li>▪ Good adsorption capacity</li> </ul> | <ul style="list-style-type: none"> <li>▪ Long residence time (8 h)</li> </ul>                                                                                                                                    | This work |
